# Supplementary material
Source: PubMed Central journal article supplement (PMC123040)
Supplement: pnas_122228699_5.pdf [file pnas_122228699_5.pdf]

| H2AX / coding join sequences |                   |                    |
|------------------------------|-------------------|--------------------|
|                              | Left coding flank | Right coding flank |
| <u>#</u>                     | <u>CAGGTCGAC</u>  | <u>GGATCCCCG</u>   |
| 1                            | CAGGTCGAC         | GGATCCCCG          |
| 1                            | CAGGTCGA          | ATCCCCG            |
| 2                            | CAG               | TCCCCG             |
| 3                            | CAGGTC            | GATCCCCG           |
| 3                            | CA                | GGATCCCCG          |
| 2                            | CA                | GATCCCCG           |
| 1                            | -9                | CCCCG              |
| 1                            | CAGGT             | TCCCCG             |
| 2                            | CAGGTCGA          | CCCCG              |
| 1                            | CAGGTCGA          | GGATCCCCG          |
| 2                            | CAGG              | TCCCCG             |
| 1                            | CAGG              | CCG                |
| 1                            | CAGGTCGA          | CCCG               |
| 1                            | CAGGT             | CG                 |
| 1                            | C                 | ATCCCCG            |
| 1                            | CAGGT             | <u>A</u> TCCCCG    |

| Wildtype (TC1) Coding join sequences |                   |                     |
|--------------------------------------|-------------------|---------------------|
|                                      | Left coding flank | Right coding flank  |
| <u>#</u>                             | <u>CAGGTCGAC</u>  | <u>GGATCCCCG</u>    |
| 1                                    | CAGGTC            | GGATCCCCG           |
| 7                                    | CA                | GGATCCCCG           |
| 2                                    | CAGGTCGA          | CCCCG               |
| 1                                    | CAGGTCGA          | GGATCCCCG           |
| 1                                    | C                 | ATCCCCG             |
| 1                                    | -9                | <u>CC</u> GGATCCCCG |
| 1                                    | -10               | GATCCCCG            |
| 3                                    | CAG               | GGATCCCCG           |
| 1                                    | CAGGTCGAC         | GATCCCCG            |
| 1                                    | CAGGTCGAC         | GATCCCCG            |
| 1                                    | CAGG              | <u>CC</u> GGATCCCCG |
| 1                                    | CA                | <u>A</u> CCG        |
| 1                                    | CAGGTC            | GGATCCCCG           |
| 1                                    | CAGGTC            | GATCCCCG            |
| 3                                    | CA                | GATCCCCG            |
| 1                                    | CA                | ATCCCCG             |
