# Supplementary material
Source: PubMed Central journal article supplement (PMC123040)
Supplement: pnas_122228699_6.pdf [file pnas_122228699_6.pdf]

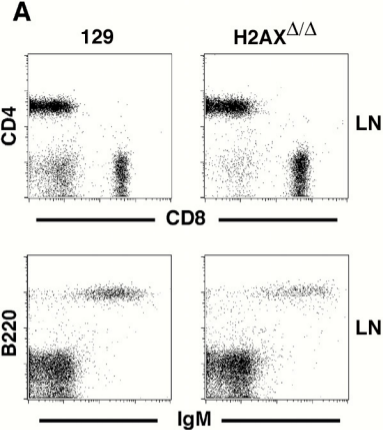

**B**

| <b>Vβ10</b>       |         | <b>Dβ2</b>            |  | <b>Jβ2.6</b>      |            |
|-------------------|---------|-----------------------|--|-------------------|------------|
| <u>GCAGCTAAGA</u> |         | <u>GGGACTGGGGGGGC</u> |  | <u>CTCCTATGAA</u> |            |
| GCAG              | TTT     | GGGGGGGC              |  | CGGGACAAA         | TGAA       |
| GC                |         | GGGC                  |  | TC                | TATGAA     |
| GCAGC             | CA      | GACTG                 |  | AGC               | CTCCTATGAA |
| GCAGC             | GT      | CTGGGGGGG             |  |                   | GAA        |
| GCAGCTAAG         | CC      | GGGGGGG               |  |                   | TGAA       |
| GCAG              | TTT     | TGGGGGGGC             |  | GCC               | TGAA       |
| GCAG              | CA      | GACTG                 |  | CTG               | -13        |
|                   |         |                       |  | <b>Jβ2.5</b>      |            |
|                   |         |                       |  | <u>AACCAAGACA</u> |            |
| GCAG              | CC      | GGACTGG               |  |                   | ACCAAGACA  |
| GCAGCT            | GCAGCT  | GGGC                  |  |                   | AAGACA     |
| GCAG              |         | CTGGGGGGGC            |  |                   | CAAGACA    |
| GCAGC             | CCCTTC  | GGGAC                 |  | AG                | ACCAAGACA  |
|                   |         |                       |  | <b>Jβ2.4</b>      |            |
|                   |         |                       |  | <u>AGTCAAAACA</u> |            |
| GCAGCTAA          | CCGGACA | GGGGGGGC              |  | T                 | AGTCAAAACA |

  

| <b>Vβ12</b>       |                 | <b>Dβ2</b>            |                 | <b>Jβ2.6</b>      |            |
|-------------------|-----------------|-----------------------|-----------------|-------------------|------------|
| <u>GCAGTTTAGC</u> |                 | <u>GGGACTGGGGGGGC</u> |                 | <u>CTCCTATGAA</u> |            |
| -11               | <u>GGCAGTC</u>  | GACTGGGGGGGC          | GTGA            |                   | GAA        |
| GCAG              | CCCC            | GGGACTGGG             | AAG             |                   | CTATGAA    |
| GCAGTT            | CCCC            | GGGACTGGGGGGG         |                 |                   | TATGAA     |
| GCAG              | <u>CGATGACA</u> | GGG                   |                 |                   | ATGAA      |
| GCAGT             | CCCC            | GGGACTGGGGGGG         |                 |                   | ATGAA      |
| GCAGTTTAG         |                 | GAC                   | AGGGG           |                   | TATGAA     |
| GCAGTTT           |                 | TGGGGGGGC             | GA              |                   | GAA        |
| GCAGTTT           | T               | GG                    |                 |                   | TATGAA     |
| GCAGTTA           | AGG             | CTGGG                 | AGATACTAG       |                   | CTCCTATGAA |
| GCAGTTTA          | AA              | GGGGGGGC              | <u>GCGAGGAA</u> |                   | TATGAA     |
| GCAG              | C               | GGACTGGGGGGG          |                 |                   | TATGAA     |
| GCAGTT            | T               | G                     |                 |                   | ATGAA      |
|                   |                 |                       |                 | <b>Jβ2.5</b>      |            |
|                   |                 |                       |                 | <u>AACCAAGACA</u> |            |
| GCAG              | GAGACT          | GGGGG                 | A               |                   | CAAGACA    |
| GCAGT             |                 | GGGG                  | TT              |                   | CCTATGAA   |
| GCAGTTTA          |                 | GC                    | CTGGCAATT       |                   | AACCAAGACA |
| GCAG              | ACA             | GGGGGC                | G               |                   | CCAAGACA   |
|                   |                 |                       |                 | <b>Jβ2.4</b>      |            |
|                   |                 |                       |                 | <u>AGTCAAAACA</u> |            |
| GCAGTT            |                 | CTGGGGGGGC            | CTAGC           |                   | CAAAACA    |
