# Supplementary material
Source: PubMed Central journal article supplement (PMC123040)

**0 rads**

**1000 rads**

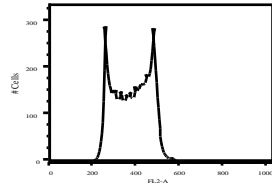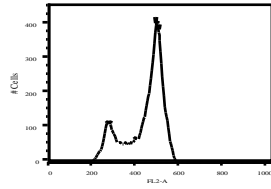

**Wild-type  
(TC1)**

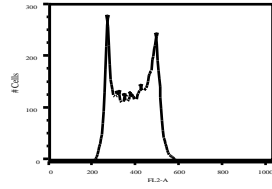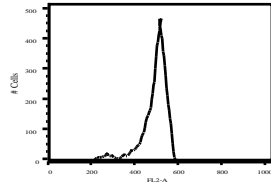

**XRCC4<sup>-/-</sup>**

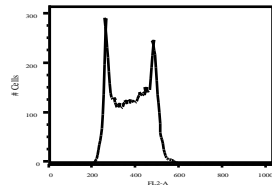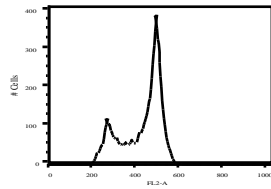

**H2AX<sup>Flox/</sup>**

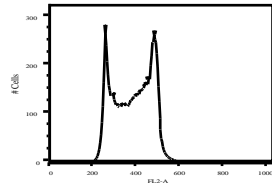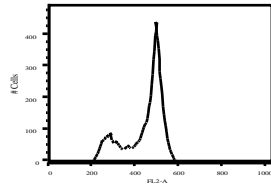

**H2AX /**

Supplement: pnas_122228699_4.pdf [file pnas_122228699_4.pdf]
